1 *Undernutrition and associated factors among people living with HIV under NACS*  
2 *assessment in Muchinga Province, Zambia, 2019-2020*

3 Ebedy Sadoki<sup>1</sup>, Constance Wose Kinge<sup>2\*</sup>, Zikhona Jojozi<sup>2</sup>, Grain Mwansa<sup>1</sup>, Ben Chirwa<sup>1</sup>,  
4 Frank Chirowa<sup>1</sup>, Eula Mothibi<sup>2</sup>, Thapelo Maotoe<sup>2</sup>, George Magwende<sup>1</sup>, Frank Shingwe<sup>1</sup>, Ian  
5 Sanne<sup>2, 4</sup>, Philip Mwala<sup>1</sup>, Charles Chasela<sup>2,3</sup>

6 <sup>1</sup>Right to Care Zambia, Mikwala House, Longacres Lusaka, Zambia

7 <sup>2</sup>Right to Care, Lenchen Avenue North, Centurion, South Africa

8 <sup>3</sup>Department of Epidemiology and Biostatistics, School of Public Health, Faculty of Health  
9 Sciences, University of the Witwatersrand, Johannesburg, South Africa

10 <sup>4</sup>Clinical HIV Research Unit, Department of Clinical Medicine, Faculty of Health Sciences,  
11 University of the Witwatersrand, Johannesburg, South Africa

12

13 \*Corresponding Author:

14 Email: [constance.wosekinge@righttocare.org](mailto:constance.wosekinge@righttocare.org) (CK)

15

## 16 **Abstract**

### 17 **Introduction**

18 Good nutrition in People Living with HIV (PLHIV) has a good influence on treatment  
19 outcomes and in turn a better quality of life. Despite, the significant role it plays, many patients  
20 have limited access to Nutritional Assessment Counselling and Support (NACS). We evaluated  
21 undernutrition in people living with HIV and associated factors in Muchinga Province, Zambia,  
22 from October 2019 to March 2020.

### 23 **Material and Methods**

24 This was secondary analysis of routine program data of HIV-positive clients on ART enrolled  
25 at EQUIP-supported health facilities in Muchinga. Undernutrition was determined using body  
26 mass index (BMI) calculations and classified as undernutrition (<18.5 kg/m<sup>2</sup>), normal (18.5 –

27 ~~NOTE: This preprint reports new research that has not been certified by peer review and should not be used to guide clinical practice.~~  
24.9 kg/m<sup>2</sup>) or over-nutrition (overweight, 25 – 29.9 kg/m<sup>2</sup> and obese, ≥ 30 kg/m<sup>2</sup>).

28 Multivariate-adjusted odds ratios (aOR) were used to assess factors associated with  
29 undernutrition.

## 30 **Results**

31 Of the 506 eligible clients under NACS, the mean age was 34.9 years  $\pm$  13.5SD, with 251  
32 (approximately 50%) between the ages of 21 – 39 years. More than half (67%) were females,  
33 284 (56%) were urban residents, and 180 (35.6 %) were unemployed. The majority  
34 (approximately 71%) were on the TLE regimen with a median duration on ART treatment of  
35 ~3 years (IQR=1– 6). There were 233 (46%) who had a normal BMI, 191 (37.7%) who had  
36 under-nutrition, and 82 (16.2%) who had over-nutrition (9.7% overweight: 6.5% obesity).  
37 Clients in the urban area (aOR= 2.0; 95%CI: 1.28 – 3.1), unemployed (aOR= 2.4 (1.18-4.69)2.4;  
38 95%CI: 1.18 – 4.69), married (aOR= 2.3; 95%CI: 1.26 – 4.38) and being on TLD (aOR= 2.8;  
39 95%CI: 1.23 – 6.23) were more likely to be under-nourished.

## 40 **Conclusion**

41 NACS played a vital role in identifying HIV-positive clients who required more specialized  
42 care for improved clinical health outcomes. There is a need to strengthen HIV and nutrition  
43 integration in low-resourced countries with high HIV burden for improved treatment outcomes  
44 and quality of life.

45 **Keywords:** Undernutrition, PLHIV, NACS, Muchinga, Zambia

## 46 **Introduction**

47 Nutrition plays an important role in the management of people living with HIV (PLHIV). Good  
48 nutrition on PLHIV has a good influence on treatment outcomes and poses a better quality of  
49 life<sup>1</sup>. Human Immunodeficiency Virus (HIV) continues to be a significant global public health  
50 problem, with sub-Saharan Africa (SSA) being the most significantly affected<sup>1,2</sup>. Sub-Saharan  
51 Africa contributes 70% (25.5 million) estimate of the global HIV infection burden and has a  
52 high burden of malnutrition<sup>2,3</sup>. HIV care and antiretroviral therapy scale-up and coverage have  
53 played a significant role in AIDS-related deaths which have reduced by more than 51% since  
54 2014<sup>4</sup>. Despite high ART scale-up and improved treatment outcomes, poor clinical outcomes  
55 remain high among PLHIV in both high and low resource settings due to compromised  
56 nutrition<sup>5</sup>.

57 The Government of Zambia began promoting interventions to improve the nutritional status of  
58 the PLHIV by making Nutrition Assessment and Counselling Services (NACS) mandatory to  
59 identify undernutrition status early, prevent undernutrition and improve treatment outcomes.  
60 EQUIP Zambia is implementing an integrated and HIV NACS program in three provinces  
61 (Muchinga, Luapula, and Northern). We evaluated undernutrition among PLHIV and  
62 determined its associated factors in Muchinga province.

## 63 **Material and Methods**

### 64 **Study design and sites**

65 This was secondary analysis of routine de-identified program HIV/NACS data in EQUIP-  
66 supported health facilities providing HIV care and treatment in Muchinga province, Zambia.  
67 Muchinga has a total of 148 facilities of which 48 are EQUIP-supported.

### 68 **Study population and data collection**

69 The study population consisted of all people living with HIV and receiving ART care in all 48  
70 EQUIP-supported facilities in Muchinga province. For logistic feasibility and inclusion

71 criteria, only sites that contributed 60 percent of the total patients currently on treatment by  
72 March 31, 2020, were included in the study. All HIV positive clients who were clinically  
73 assessed for NACS and had complete anthropometric data were included in the analysis. De-  
74 identified clients' demographics, clinical as well as related data collection included age, sex,  
75 residency, occupation, income, height, weight, duration on ART, and viral load. Weight was a  
76 measure to the nearest 1Kg, height was a measure to the nearest scale of 0.1 cm using a (Salter  
77 scale). All information collected was recorded in the NACS log sheet.

### 78 **Data management and statistical analysis**

79 Body mass index (BMI) was calculated as weight (kg)/height (m<sup>2</sup>) and categorized based on  
80 WHO guidelines as underweight (<18.5kg/m<sup>2</sup>), normal (18.5–24.9 kg/m<sup>2</sup>), overweight (25 –  
81 29.9 kg/m<sup>2</sup>) and obese (25–29.9 kg/m<sup>2</sup>). For this study, undernutrition was defined as BMI  
82 below 18.5kg/m<sup>2</sup>. All analysis was performed using STATA/SE version 16.1 software  
83 (StataCorp, College Station, Texas 77845 USA). Categorical and continuous variables were  
84 summarized using proportions and median/means, respectively. Differences between  
85 proportions were determined using chi square test and Fischer exact test for sparse data.  
86 Multivariate logistics regression was used to identify factors associated with undernutrition.

### 87 **Ethical clearance**

88 Since nutritional assessment forms a part of the HIV care and treatment services provided to  
89 PLHIV, no informed consent from clients was required. Permission to access de-identified  
90 client data was granted by Right to Care Zambia Not for Profit Organisation (NPO). Ethics was  
91 obtained from ERES CONVERGE IRB, Zambia (IRB No. 00005948).

## 92 Results

### 93 Characteristics of participants

94 Of the 7,898 clients assessed, only 506 (6.4%) were eligible for this study. The majority  
 95 (n=7,392) were excluded due to inadequate documentation in the NACS logs sheet, no height  
 96 or weight measurements and subsequent current nutrition status (Figure 1).

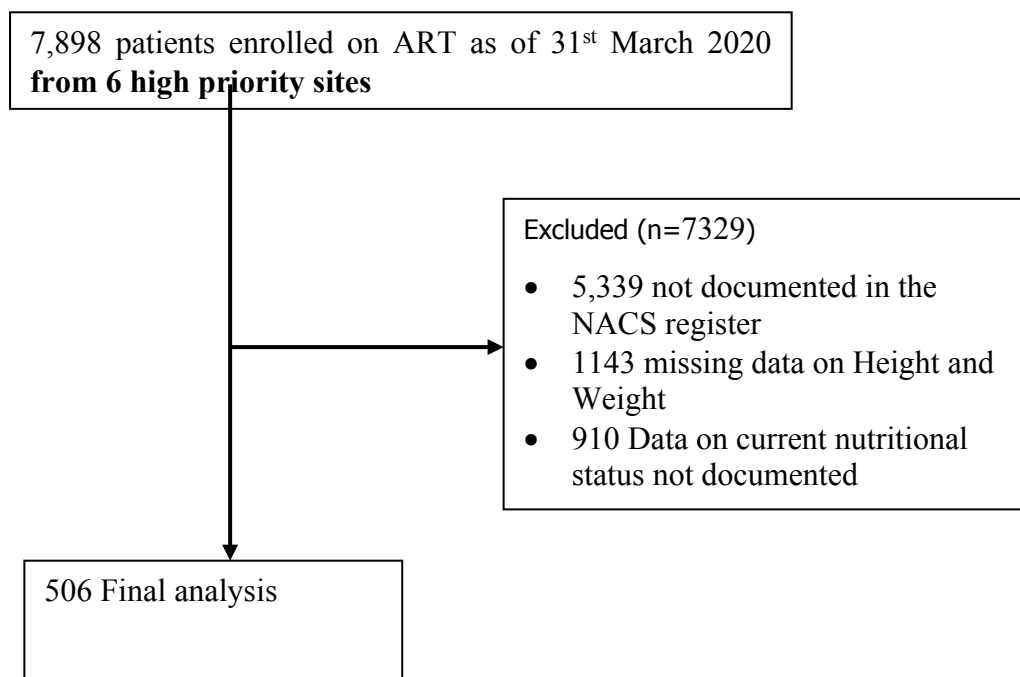

97

98 Figure 1: Participant Enrolment Flow

99 The mean age (SD) of the participants (n=506) was 34.9 (13.5) years. Most participants were  
 100 female, unemployed, ever married, of low income, at least had a primary school education,  
 101 suppressed viral load, on ART for less than 3 years, and were on TLE. Of the 506 participants,  
 102 191 (37.8%) were undernourished and the rest were either normal or overweight/obese (Table  
 103 1).

104 **Table 1** Characteristics of the study population by Nutrition status

| Variables                      | Total (%)   | Undernourished<br>N=191 (37.8%) | Normal<br>N=233 (46.1%) | Overweight<br>N=49 (9.7%) | Obese<br>N=33 (6.5%) |
|--------------------------------|-------------|---------------------------------|-------------------------|---------------------------|----------------------|
| <b>Age in years, mean (SD)</b> | 34.9 (13.5) | 31.2 (14.9)                     | 36.0 (11.7)             | 40.6 (11.0)               | 40.5 (14.4)          |
| <b>Age group</b>               |             |                                 |                         |                           |                      |
| ≤20                            | 71 (14.0)   | 51 (26.7)                       | 16 (6.9)                | 2 (4.1)                   | 2 (6.1)              |
| 21-39                          | 251 (49.6)  | 86 (45.0)                       | 135 (57.9)              | 19 (38.8)                 | 11 (33.3)            |
| 40 and above                   | 184 (36.6)  | 54 (28.3)                       | 82 (35.2)               | 28 (57.1)                 | 20 (60.6)            |

|                               |            |            |            |           |           |
|-------------------------------|------------|------------|------------|-----------|-----------|
| <b>Sex</b>                    |            |            |            |           |           |
| Male                          | 166 (32.8) | 63 (33.0)  | 86 (36.9)  | 10 (20.4) | 7 (21.2)  |
| Female                        | 340 (67.2) | 128 (67.0) | 147 (63.1) | 39 (79.6) | 26 (78.8) |
| <b>Residency</b>              |            |            |            |           |           |
| Rural                         | 222 (43.9) | 65 (34.0)  | 108 (46.3) | 29 (59.2) | 20 (60.6) |
| Urban                         | 284 (56.1) | 126 (66.0) | 125 (53.7) | 20 (40.8) | 13 (39.4) |
| <b>Occupation</b>             |            |            |            |           |           |
| Business                      | 77 (15.2)  | 18 (9.4)   | 42 (18.0)  | 11 (22.5) | 6 (18.2)  |
| Farmer                        | 117 (23.1) | 33 (17.3)  | 62 (27.0)  | 12 (24.5) | 10 (30.3) |
| Unemployed                    | 180 (35.6) | 98 (51.3)  | 66 (28.3)  | 7 (14.3)  | 9 (27.3)  |
| Unknown                       | 34 (6.7)   | 7 (3.7)    | 24 (10.0)  | 3 (6.0)   | 0 (0.0)   |
| Other                         | 98 (19.4)  | 35 (18.3)  | 39 (16.7)  | 16 (32.7) | 8 (24.2)  |
| <b>Marital Status</b>         |            |            |            |           |           |
| Single                        | 122 (24.1) | 54 (28.3)  | 51 (21.9)  | 9 (18.4)  | 8 (24.2)  |
| Married                       | 261 (51.6) | 109 (57.1) | 115(49.4)  | 22 (44.9) | 15 (45.5) |
| Divorced                      | 39 (7.7)   | 10 (5.2)   | 18 (7.7)   | 8 (16.3)  | 3 (9.1)   |
| Widowed                       | 24 (4.7)   | 4 (2.1)    | 13 (5.6)   | 4 (8.2)   | 3 (9.1)   |
| Unknown                       | 60 (11.9)  | 14 (7.3)   | 36 (15.4)  | 6 (12.2)  | 4 (12.1)  |
| <b>Income</b>                 |            |            |            |           |           |
| <K500                         | 26 (5.1)   | 6 (3.1)    | 18 (7.7)   | 2 (4.1)   | 0 (0.0)   |
| K500 - K999                   | 62 (12.3)  | 17 (9.0)   | 33 (14.2)  | 10 (20.4) | 2 (6.1)   |
| K1000 - K1499                 | 23 (4.6)   | 11 (5.8)   | 6 (2.6)    | 4 (8.2)   | 2 (6.0)   |
| K1500 – K1999                 | 10 (2.0)   | 1 (1.0)    | 8 (3.4)    | 1 (2.0)   | 0 (0.0)   |
| K2000 – K2999                 | 11 (2.2)   | 6 (3.1)    | 4 (1.7)    | 1 (2.0)   | 0 (0.0)   |
| >=K3000                       | 36 (7.0)   | 11 (6.0)   | 16 (6.9)   | 4 (8.2)   | 5 (15.2)  |
| Unknown                       | 338 (66.8) | 139 (73.0) | 148 (63.5) | 27 (55.1) | 24 (72.7) |
| <b>Educational Level</b>      |            |            |            |           |           |
| Not yet in school             | 15 (3.0)   | 10 (5.2)   | 3 (1.3)    | 0 (0.0)   | 2 (6.1)   |
| Primary                       | 158 (31.2) | 78 (40.8)  | 61 (26.2)  | 11 (22.5) | 8 (24.2)  |
| Secondary                     | 219 (43.3) | 62 (32.5)  | 117 (50.2) | 26 (53.0) | 14 (42.4) |
| Tertiary                      | 29 (5.7)   | 9 (4.7)    | 12 (5.2)   | 5 (10.2)  | 3 (9.1)   |
| Never been to school          | 17 (3.4)   | 8 (4.2)    | 8 (3.4)    | 0 (0.0)   | 1 (3.0)   |
| Unknown                       | 68 (13.4)  | 24 (12.6)  | 32 (13.7)  | 7 (14.3)  | 5 (15.2)  |
| <b>Viral Load (copies/mL)</b> |            |            |            |           |           |
| <1000                         | 275 (54.4) | 106 (55.5) | 131 (56.2) | 23 (47.0) | 15 (45.5) |
| ≥1000                         | 35 (6.9)   | 19 (10.0)  | 11 (4.7)   | 3 (6.1)   | 2 (6.0)   |
| Missing                       | 196 (38.7) | 66 (34.5)  | 91 (39.1)  | 23 (46.9) | 16 (48.5) |
| <b>ART Regimen</b>            |            |            |            |           |           |
| TLD                           | 92 (18.2)  | 42 (22.0)  | 30 (12.9)  | 12 (24.5) | 8 (24.0)  |
| TLE                           | 357 (70.5) | 128 (67.0) | 175 (75.1) | 33 (67.3) | 21 (64.0) |
| Other                         | 57 (11.3)  | 21 (11.0)  | 28 (12.0)  | 4 (8.2)   | 4 (12.0)  |
| <b>Years on ART</b>           |            |            |            |           |           |
| < 3                           | 254 (50.2) | 104 (54.4) | 115 (49.4) | 20 (40.8) | 15 (45.4) |
| 3 - <6                        | 116 (22.9) | 44 (23.0)  | 57 (24.5)  | 10 (20.4) | 5 (15.2)  |
| 6 - <9                        | 82 (16.2)  | 28 (14.7)  | 36 (15.4)  | 10 (20.4) | 8 (24.2)  |
| 9 years and above             | 54 (10.7)  | 15 (7.9)   | 25 (10.7)  | 9 (18.4)  | 5 (15.2)  |

105

## 106 Factors associated with undernutrition

107 In the bivariate analysis, age, residence, occupation, income, educational level and viral load

108 were significantly associated with undernourishment. Age was protective with 80% less odds

109 for undernutrition among age groups above 20 years. Similarly, marital status was protective  
 110 against undernutrition for all categories of marriage except for those single. Area of residence  
 111 (rural/urban), income, educational level and viral load were statistically significant with high  
 112 odds for undernourishment. In the multivariable analysis, age was protective with 80% to 90%  
 113 reduction in odds for undernutrition among those aged 21-39 years and above 40 years  
 114 respectively. The odds of undernutrition were two times higher for urban residents, and among  
 115 those unemployed. While marital status was protective in bivariate analysis, there was two  
 116 times odds for undernutrition among those married compared to being single. While viral load  
 117 was statistically significant in the bivariate analysis, there was borderline statistical  
 118 significance with two times odds for undernutrition among those viral unsuppressed (Table 2).  
 119

120 **Table 2:** Factors associated with undernutrition

| Variables                  | Undernourished |            | Crude OR (95% CI) | p-value | Adjusted OR (95% CI) | p-value |
|----------------------------|----------------|------------|-------------------|---------|----------------------|---------|
|                            | No; n (%)      | Yes; n (%) |                   |         |                      |         |
| Age in years, median (IQR) | 37 (29-45)     | 32 (20-41) | 1.0 (0.95-0.98)   | <0.001  |                      |         |
| <b>Age group</b>           |                |            |                   | <0.001  |                      |         |
| ≤20                        | 20 (6.3)       | 51 (26.7)  | Reference         |         | Reference            |         |
| 21-39                      | 165 (52.4)     | 86 (45.0)  | 0.2 (0.11-0.36)   |         | 0.2 (0.08-0.36)      | <0.01   |
| 40 and above               | 130 (41.3)     | 54 (28.3)  | 0.2 (0.09-0.29)   |         | 0.1 (0.06-0.35)      | <0.01   |
| <b>Sex</b>                 |                |            |                   | 0.9471  |                      |         |
| Male                       | 103 (32.7)     | 63 (33.0)  | Reference         |         |                      |         |
| Female                     | 212 (67.3)     | 128 (67.0) | 1.0 (0.67-1.45)   |         |                      |         |
| <b>Residency</b>           |                |            |                   | 0.001   |                      |         |
| Rural                      | 157 (49.8)     | 65 (34.0)  | Reference         |         | Reference            |         |
| Urban                      | 158 (50.2)     | 126 (66.0) | 1.9 (1.33-2.79)   |         | 2.0 (1.28-3.19)      | 0.002   |
| <b>Occupation</b>          |                |            |                   | <0.001  |                      |         |
| Business                   | 59 (18.7)      | 18 (9.4)   | Reference         |         | Reference            |         |
| Farmer                     | 84 (26.7)      | 33 (17.3)  | 1.3 (0.66-2.50)   |         | 1.6 (0.77-3.24)      |         |
| Unemployed                 | 82 (26.0)      | 98 (51.3)  | 3.9 (2.14-7.17)   |         | 2.4 (1.18-4.69)      | 0.015   |
| Unknown                    | 27 (8.6)       | 7 (3.7)    | 0.8 (0.32-2.27)   |         | 0.7 (0.25-1.98)      |         |
| Other                      | 63 (20.0)      | 35 (18.3)  | 1.8 (0.93-3.56)   |         | 1.3 (0.66- 2.73)     |         |
| <b>Marital Status</b>      |                |            |                   | 0.0196  |                      |         |
| Single                     | 68 (21.6)      | 54 (28.3)  | Reference         | 0.0017  | Reference            |         |
| Married                    | 152 (48.2)     | 109 (57.1) | 0.9 (0.59-1.39)   |         | 2.3 (1.26-4.38)      | 0.007   |
| Divorced                   | 29 (9.2)       | 10 (5.2)   | 0.4 (0.19-0.97)   |         | 1.9 (0.75-5.04)      |         |
| Widowed                    | 20 (6.4)       | 4 (2.1)    | 0.3 (0.08-0.78)   |         | 1.1 (0.30-3.76)      |         |
| Unknown                    | 46 (14.6)      | 14 (7.3)   | 0.4 (0.19-0.77)   |         | 1.1 (0.48-2.67)      |         |
| <b>Income</b>              |                |            |                   |         |                      |         |

|                                   |            |            |                  |                 |       |
|-----------------------------------|------------|------------|------------------|-----------------|-------|
| <K500                             | 20 (6.3)   | 6 (3.1)    | Reference        | 0.0279          |       |
| K500 - K999                       | 45 (14.3)  | 17 (8.9)   | 1.3 (0.43-3.67)  |                 |       |
| K1000 - K1499                     | 12 (3.9)   | 11 (5.8)   | 3.1 (0.90-10.41) |                 |       |
| K1500 – K1999                     | 9 (2.9)    | 1 (0.5)    | 0.4 (0.04-3.54)  |                 |       |
| K2000 – K2999                     | 5 (1.6)    | 6 (3.1)    | 4.0 (0.90-17.87) |                 |       |
| >=K3000                           | 25 (7.9)   | 11 (5.8)   | 1.5 (0.46-4.66)  |                 |       |
| Unknown                           | 199 (63.1) | 139 (72.8) | 2.3 (0.91-5.95)  |                 |       |
| <b>Educational Level</b>          |            |            |                  | 0.0002          |       |
| Not yet in school                 | 5 (1.6)    | 10 (5.2)   | Reference        |                 |       |
| Primary                           | 80 (25.4)  | 78 (40.8)  | 0.5 (0.16-1.49)  |                 |       |
| Secondary                         | 157 (49.8) | 62 (32.5)  | 0.2 (0.06-0.60)  |                 |       |
| Tertiary                          | 20 (6.3)   | 9 (4.7)    | 0.2 (0.06-0.85)  |                 |       |
| Never been to school              | 9 (2.9)    | 8 (4.2)    | 0.4 (0.11-1.87)  |                 |       |
| Unknown                           | 13 (14.0)  | 24 (12.6)  | 0.3 (0.08-0.89)  |                 |       |
| <b>Viral Load (copies/mL)</b>     |            |            |                  | 0.0670          |       |
| <1000                             | 169 (53.7) | 106 (55.5) | Reference        | Reference       |       |
| ≥1000                             | 16 (5.0)   | 9 (10.0)   | 1.9 (0.93-3.84)  | 2.1 (0.90-4.68) | 0.087 |
| Missing                           | 130 (41.3) | 66 (34.5)  | 0.8 (0.55-1.19)  | 0.9 (0.61-2.68) |       |
| <b>ART Regimen</b>                |            |            |                  | 0.2277          |       |
| TLD                               | 50 (15.9)  | 42 (22.0)  | 1.4 (0.73-2.83)  | 2.8 (1.23-6.23) | 0.012 |
| TLE                               | 229 (72.7) | 128 (67.0) | 1.0 (0.54-1.71)  | 1.3 (0.68-2.68) |       |
| Other                             | 36 (11.4)  | 21 (11.0)  | Reference        | Reference       |       |
| <b>Duration on ART (in years)</b> |            |            |                  | 0.2572          |       |
| < 3                               | 153 (48.6) | 106 (55.5) | Reference        |                 |       |
| 3 - <6                            | 71 (22.5)  | 42 (22.0)  | 0.9 (0.54-1.35)  |                 |       |
| 6 - <9                            | 53 (16.8)  | 29 (15.2)  | 0.8 (0.47-1.32)  |                 |       |
| 9 years and above                 | 38 (12.1)  | 14 (7.3)   | 0.5 (0.27-1.03)  |                 |       |

121

## 122 Discussion

123 In this study, we evaluated undernutrition using NACS and determined its associated factors  
 124 among PLHIV in Muchinga Province, Zambia. Undernutrition was found in more than one-  
 125 third of the population with most either normal, overweight or obese. Most of the participants  
 126 evaluated were middle aged, resident in urban, married, on TLE and less than 3 years on ART.  
 127 Age was protective and being undernourished was less likely in the older age groups. However,  
 128 being an urban resident, being married, unemployed, being on TLD and viral unsuppression  
 129 increased the odds for undernutrition.

130 The protective age observed is in line with other studies that showed reduced chances of  
 131 undernutrition among those who were older<sup>6</sup>. While you would expect undernutrition to be  
 132 more in rural areas, our study found higher odds of undernutrition among those living in the  
 133 urban areas. This may be attributed to food insecurity as opposed to those in the rural areas



134 who engage in extensive farming activities and therefore have more access to food. In addition,  
135 the population evaluated were more from the urban population. In a qualitative study done in  
136 urban Zambia among women assessing acceptance and adherence to ART, hunger was found  
137 to be one of the factors affecting adherence and ART intake. In another food insecurity report,  
138 93% of households in the informal settlements, (making 75% of Lusaka's urban population)  
139 were food insecure<sup>7</sup> affirming nutrition vulnerabilities in some urban sub-populations. Food  
140 insecurity has been found to be a major cause of undernutrition, thus compromising treatment  
141 outcomes among PLHIV<sup>8,9</sup>.

142 In our study, those on TLD regimen had three times odds of being undernourished than those  
143 on other regimens. This is different with other studies where the transition to DTG in virally  
144 suppressed adolescents (aged 10–19 years) was associated with an increase in the rate of BMI  
145 change<sup>10</sup>. In this study, though unsuppressed viral load was shown to be borderline statistically  
146 significant with two times odds, this finding is consistent with a study in Malawi that showed  
147 unsuppressed viral load and undernutrition among many of the factors associated with high  
148 mortality among PLHIV on ART<sup>11</sup>.

149 In conclusion Nutritional Assessment, Counselling, and Support played a vital role in  
150 identifying HIV-positive clients who require more specialized care for improved clinical health  
151 outcomes. This is more crucial especially during this era of COVID-19. There is therefore a  
152 need for continued strengthening of HIV and nutrition integration in countries with a high HIV  
153 burden to prevent treatment disruption for improved quality of life. NACS helps with the  
154 prevention of undernutrition and early identification and treatment, which leads to  
155 improvement of health outcomes for PLHIV in care.

## 156 **Acknowledgements:**

157 The authors wish to express sincere gratitude to colleagues from the Ministry of Health  
158 Zambia and Right to Care Zambia Direct Service Delivery (DSD) staff for their technical  
159 support.

## 160 **Funding:**

161 Funding for the EQUIP program was provided by USAID (Grant Number AID-OAA-A-15-  
162 00070). The funders had no role in study design, data collection and analysis, decision to  
163 publish, or preparation of the manuscript.

## 164 **Competing interests:**

165 The authors have declared no competing interests.

## 166 **Data Availability Statement:**

167 All relevant data are within the manuscript and its Supporting Information files.

## 168 **References**

- 169 1. Oumer Abdu A, Abebaw Mekonnen B. Episodes of Undernutrition and its Predictors  
170 among Clients on Antiretroviral Treatment in Southwest Ethiopia: A Record Review.  
171 *HIV AIDS (Auckl)*. 2021;13:61-71. doi:10.2147/hiv.S286609
- 172 2. Alebel A, Demant D, Petručka P, Sibbritt D. Effects of undernutrition on mortality and  
173 morbidity among adults living with HIV in sub-Saharan Africa: a systematic review  
174 and meta-analysis. *BMC Infect Dis*. Jan 4 2021;21(1):1. doi:10.1186/s12879-020-  
175 05706-z
- 176 3. Takarinda KC, Mutasa-Apollo T, Madzima B, et al. Malnutrition status and associated  
177 factors among HIV-positive patients enrolled in ART clinics in Zimbabwe. *BMC*  
178 *Nutrition*. 2017/02/06 2017;3(1):15. doi:10.1186/s40795-017-0132-8
- 179 4. Ayele TA, Worku A, Kebede Y, Alemu K, Kasim A, Shkedy Z. Choice of initial  
180 antiretroviral drugs and treatment outcomes among HIV-infected patients in sub-  
181 Saharan Africa: systematic review and meta-analysis of observational studies. *Syst Rev*.  
182 Aug 25 2017;6(1):173. doi:10.1186/s13643-017-0567-7
- 183 5. Benzekri NA, Seydi M, I ND, et al. HIV and the dual burden of malnutrition in Senegal,  
184 1994-2012. *Int J STD AIDS*. Oct 2018;29(12):1165-1173.  
185 doi:10.1177/0956462418777364
- 186 6. Yitbarek GY, Engidaw MT, Ayele BA, Tiruneh SA, Alamir MT. Magnitude of  
187 Obesity/Overweight and Its Associated Factors Among HIV/AIDS Patients on  
188 Antiretroviral Therapy in Jimma Zone Hospitals, South West Ethiopia: Hospital-Based  
189 Cross-Sectional Study. *Diabetes Metab Syndr Obes*. 2020;13:1251-1258.  
190 doi:10.2147/dms0.S247221
- 191 7. Mulenga C. *The State of food insecurity in Lusaka Zambia*. 2013. *Urban Food Security*  
192 19. 2013. Accessed 21st July, 2021. [www.afsun.org/wp-](http://www.afsun.org/wp-content/uploads/2016/06/AFSUN19.pdf)  
193 [content/uploads/2016/06/AFSUN19.pdf](http://www.afsun.org/wp-content/uploads/2016/06/AFSUN19.pdf)

- 194 8. Nigusso FT, Mavhandu-Mudzusi AH. High magnitude of food insecurity and  
195 malnutrition among people living with HIV/AIDS in Ethiopia: A call for integration of  
196 food and nutrition security with HIV treatment and care Programme. *Nutr Health*. Jun  
197 2021;27(2):141-150. doi:10.1177/0260106020971855
- 198 9. Chop E, Duggaraju A, Malley A, et al. Food insecurity, sexual risk behavior, and  
199 adherence to antiretroviral therapy among women living with HIV: A systematic  
200 review. *Health Care Women Int*. Sep 2017;38(9):927-944.  
201 doi:10.1080/07399332.2017.1337774
- 202 10. Thivalapill N, Simelane T, Mthethwa N, et al. Transition to dolutegravir is associated  
203 with an increase in the rate of BMI change in a cohort of virally suppressed adolescents.  
204 *Clin Infect Dis*. Oct 29 2020;doi:10.1093/cid/ciaa1652
- 205 11. Huibers MHW, Bates I, McKew S, et al. Severe anaemia complicating HIV in Malawi;  
206 Multiple co-existing aetiologies are associated with high mortality. *PLoS One*.  
207 2020;15(2):e0218695. doi:10.1371/journal.pone.0218695
- 208 12. Ekholuenetale, M., Tudeme, G., Onikan, A. *et al.* Socioeconomic inequalities in hidden  
209 hunger, undernutrition, and overweight among under-five children in 35 sub-Saharan  
210 Africa countries. *J. Egypt. Public. Health. Assoc.* **95**, 9 (2020).  
211 <https://doi.org/10.1186/s42506-019-0034-5>

212

213

214

215
